# Supplementary material for: CHANGES IN STROKE REHABILITATION DURING THE SARS-COV-2 SHUTDOWN IN SWITZERLAND
Source: PubMed Central journal article supplement — J Rehabil Med. 2022 Mar 1;54:1118. doi: 10.2340/jrm.v53.1118 (PMC8902586; doi:10.2340/jrm.v53.1118), 2022-03-01
Supplement: JRM-54-1118-s2.pdf [file JRM-54-1118-s2.pdf]

**Table SI.** Demographic and baseline characteristics of the participants vs non-participants

|                                                                 | Participants<br><i>n</i> = 36 | Non-participants<br><i>n</i> = 40 | Significance    |
|-----------------------------------------------------------------|-------------------------------|-----------------------------------|-----------------|
| Age, years, median (Q1-Q3)                                      | 70 (62-77)                    | 74 (66.75-80)                     | >0.05           |
| Sex, men/woman, <i>n</i>                                        | 19/17                         | 23/17                             | >0.05           |
| Handedness, left/right, <i>n</i>                                | 3/33                          | 2/48                              | >0.05           |
| General Health, Cumulative Illness Rating Scale, median (Q1-Q3) | 3 (2-6)                       | NA                                | >0.05           |
| Stroke type, <i>n</i> (%)                                       |                               |                                   | >0.05           |
| Ischaemic                                                       | 32 (88.9)                     | 32 (80)                           | >0.05           |
| Haemorrhagic                                                    | 4 (11.1)                      | 8 (20)                            | >0.05           |
| Time since stroke, median (Q1-Q3), days                         | 300 (171-428)                 | 212 (160-374)                     | >0.05           |
| Stroke location, <i>n</i> (%), Bamford                          |                               |                                   | >0.05           |
| Lacunar stroke (LACI)                                           | 16 (44.4)                     | 16 (40)                           | >0.05           |
| Total anterior circulation stroke (TACS)                        | 8 (22.2)                      | 7 (17.5)                          | >0.05           |
| Partial anterior circulation stroke (PACS)                      | 10 (27.8)                     | 13 (32.5)                         | >0.05           |
| Posterior circulation stroke (POCS)                             | 2 (5.6)                       | 4 (10)                            | >0.05           |
| Stroke severity hospital admission, NIHSS, median (Q1-Q3)       | 2 (1-6)                       | 4.5 (1-10)                        | >0.05           |
| Time in acute hospitalization, days, median (Q1-Q3)             | 9 (8-12)                      | 9 (7-12)                          | >0.05           |
| Time in inpatient rehabilitation, days, median (Q1-Q3)          | 46 (29-77)                    | NA                                | >0.05           |
| Time since last study visit, days, median (Q1-Q3)               | 160 (76-215)                  | 128 (90-194)                      | >0.05           |
| Independent living (Home), yes                                  | 29 (80.6)                     |                                   | >0.05           |
| Disability or dependence, modified Rankin Scale, median (Q1-Q3) | 2 (1-3)                       | 3 (1-4)                           | <b>&lt;0.05</b> |
| Ambulation, Functional Independence Categories, median (Q1-Q3)  | 5 (4-5)                       | 3 (0-5)                           | <b>&lt;0.05</b> |
| Cognitive status, Montreal Cognitive Assessment, median (Q1-Q3) | 27 (22.5-29)                  | 17 (25-27)                        | >0.05           |

NIHSS: National Institute of Health Stroke Scale; N: number; Q: quartile. Bold font indicates *p*-values with a statistical significance of <0.05.
