# Supplementary material for: CHANGES IN STROKE REHABILITATION DURING THE SARS-COV-2 SHUTDOWN IN SWITZERLAND
Source: PubMed Central journal article supplement — J Rehabil Med. 2022 Mar 1;54:1118. doi: 10.2340/jrm.v53.1118 (PMC8902586; doi:10.2340/jrm.v53.1118), 2022-03-01
Supplement: JRM-54-1118-s3.pdf [file JRM-54-1118-s3.pdf]

**Table SII.** Additional outcomes

| Assessment                                                            | Retrospective data | Visit 1 Lockdown    |                 | Visit 2 Partially opening |                 | Visit 3 3-months Follow-up |                  |
|-----------------------------------------------------------------------|--------------------|---------------------|-----------------|---------------------------|-----------------|----------------------------|------------------|
|                                                                       | Median (Q1–Q3)     | Median (Q1–Q3)      | <i>p</i> -value | Median (Q1–Q3)            | <i>p</i> -value | Median (Q1–Q3)             | <i>p</i> -value  |
| Activities-specific Balance Confidence Scale                          | NA                 | 76.88 (53.75-93.13) | 0.146           | 86.09 (51.88-95.63)       | 0.491           | 79.38 (58.28-92.81)        | <b>&lt;0.001</b> |
| International Physical Activity Questionnaire                         |                    |                     |                 |                           |                 |                            |                  |
| Domestic and Garden MET-min/week                                      | 15 (0–360)         | 75 (0–675)          | 0.471           | 300 (15–540)              | 0.602           | 180 (0–1,380)              | <b>0.010</b>     |
| Leisure-Time MET-min/week                                             | 240 (0–858)        | 371.25 (0–804.38)   | 0.565           | 693 (140–1,453.50)        | 0.426           | 891 (66–1,386)             | 0.079            |
| Transport MET-min/week                                                | 167.75 (0–798.75)  | 30 (0–359.55)       | 0.216           | 177 (0–297)               | 0.646           | 288 (60–648)               | 0.317            |
| Work MET-min/week                                                     | 0 (0–0)            | 0 (0–0)             | 0.136           | 0 (0–0)                   | 0.820           | 0 (0–0)                    | 0.978            |
| Patient-Reported Outcomes Measurement Information System – 29 Version |                    |                     |                 |                           |                 |                            |                  |
| Anxiety, depression, sleep, and pain subscale                         | NA                 | 29.5 (26.75–39)     | 0.937           | 32 (28–38.25)             | 0.422           | 33 (27.50–38.50)           | 0.957            |
| Fatigue Severity Scale                                                | 36.5 (24–44)       | 35.5 (24.75–44.25)  | 0.734           | 37 (28–50)                | 0.596           | 37 (28–44)                 | 0.578            |
| National Institutes of Health Stroke Scale                            | 2 (1–6)            | NA                  | NA              | 2 (0–4)                   | 0.110           | 2 (0–4)                    | <b>0.004</b>     |

MET: metabolic equivalent of tasks; NA: not applicable; Q: quartile. Bold font indicates *p*-values with a statistical significance of < 0.05.
