# Supplementary material for: CHANGES IN STROKE REHABILITATION DURING THE SARS-COV-2 SHUTDOWN IN SWITZERLAND
Source: PubMed Central journal article supplement — J Rehabil Med. 2022 Mar 1;54:1118. doi: 10.2340/jrm.v53.1118 (PMC8902586; doi:10.2340/jrm.v53.1118), 2022-03-01
Supplement: JRM-54-1118-s4.pdf [file JRM-54-1118-s4.pdf]

**Table SIV.** Linear mixed effect models on self-reported physical functioning and mood

| Model                       | Variable (fixed and random effects) | Estimate  | p-value        |
|-----------------------------|-------------------------------------|-----------|----------------|
| IPAQ METS Total             | Study start                         | 562.11    | 0.39038        |
| IPAQ METS Total             | End of shutdown                     | 304.05    | 0.66217        |
| IPAQ METS Total             | Follow-up                           | 1,715.00  | <b>0.01509</b> |
| IPAQ METS Total             | NIHSS                               | -83.65    | 0.44772        |
| IPAQ METS Total             | Sex (male)                          | -1,890.68 | <b>0.03280</b> |
| IPAQ METS Total             | Days since stroke                   | -1.75     | 0.60237        |
| IPAQ METS Total             | Age                                 | -22.49    | 0.53118        |
| IPAQ METS Total             | Self-directed training: Yes=1/No=0  | -842.81   | 0.19810        |
| IPAQ METS Total             | Therapy reduction: Yes=1/No=0       | -649.31   | 0.55273        |
| IPAQ METS Total             | Random subject factor               |           | <b>0.00661</b> |
| IPAQ Sitting                | Study start                         | 1,189.70  | <b>0.00067</b> |
| IPAQ Sitting                | End of shutdown                     | 1,194.73  | <b>0.00120</b> |
| IPAQ Sitting                | Follow-up                           | 208.16    | 0.55684        |
| IPAQ Sitting                | NIHSS                               | 74.88     | <b>0.03833</b> |
| IPAQ Sitting                | Sex (male)                          | 1,125.27  | <b>0.00012</b> |
| IPAQ Sitting                | Days since stroke                   | -2.67     | <b>0.01607</b> |
| IPAQ Sitting                | Age                                 | -11.14    | 0.34821        |
| IPAQ Sitting                | Self-directed training: Yes=1/No=0  | 68.17     | 0.81778        |
| IPAQ Sitting                | Therapy reduction: Yes=1/No=0       | 486.51    | 0.17656        |
| IPAQ Sitting                | Random subject factor               |           | 1.00000        |
| HADS Depression Sub-score   | Study start                         | 1.26      | <b>0.03432</b> |
| HADS Depression Sub-score   | End of shutdown                     | 1.28      | <b>0.04680</b> |
| HADS Depression Sub-score   | Follow-up                           | 1.37      | <b>0.03960</b> |
| HADS Depression Sub-score   | NIHSS                               | 0.24      | 0.21335        |
| HADS Depression Sub-score   | Sex (male)                          | 0.43      | 0.76705        |
| HADS Depression Sub-score   | Days since stroke                   | -0.01     | 0.19475        |
| HADS Depression Sub-score   | Age                                 | -0.03     | 0.58696        |
| HADS Depression Sub-score   | Self-directed training: Yes=1/No=0  | -0.95     | 0.13782        |
| HADS Depression Sub-score   | Therapy reduction: Yes=1/No=0       | -1.84     | 0.34690        |
| HADS Depression Sub-score   | Random subject factor               |           | <b>0.00000</b> |
| HADS Anxiety Sub-score      | Study start                         | -1.62     | <b>0.01843</b> |
| HADS Anxiety Sub-score      | End of shutdown                     | -1.17     | 0.11336        |
| HADS Anxiety Sub-score      | Follow-up                           | -1.51     | <b>0.04807</b> |
| HADS Anxiety Sub-score      | NIHSS                               | 0.06      | 0.67021        |
| HADS Anxiety Sub-score      | Sex (male)                          | 0.69      | 0.54355        |
| HADS Anxiety Sub-score      | Days since stroke                   | 0.00      | 0.45916        |
| HADS Anxiety Sub-score      | Age                                 | -0.03     | 0.54668        |
| HADS Anxiety Sub-score      | Self-directed training: Yes=1/No=0  | -0.09     | 0.89841        |
| HADS Anxiety Sub-score      | Therapy reduction: Yes=1/No=0       | 2.61      | 0.09557        |
| HADS Anxiety Sub-score      | Random subject factor               |           | <b>0.00001</b> |
| FAC                         | Study start                         | 0.38      | <b>0.03649</b> |
| FAC                         | End of shutdown                     | 0.62      | <b>0.00193</b> |
| FAC                         | Follow-up                           | 0.42      | <b>0.03698</b> |
| FAC                         | NIHSS                               | -0.28     | <b>0.00001</b> |
| FAC                         | Sex (male)                          | -0.64     | 0.09429        |
| FAC                         | Days since stroke                   | 0.00      | 0.46507        |
| FAC                         | Age                                 | -0.02     | 0.20028        |
| FAC                         | Self-directed training: Yes=1/No=0  | -0.26     | 0.17700        |
| FAC                         | Therapy reduction: Yes=1/No=0       | -0.21     | 0.66471        |
| FAC                         | Random subject factor               |           | <b>0.00000</b> |
| MAL14 - Quality of Movement | Study start                         | 0.47      | <b>0.01366</b> |
| MAL14 - Quality of Movement | End of shutdown                     | 0.32      | 0.10627        |
| MAL14 - Quality of Movement | Follow-up                           | 0.31      | 0.15070        |
| MAL14 - Quality of Movement | NIHSS                               | -0.35     | <b>0.00002</b> |
| MAL14 - Quality of Movement | Sex (male)                          | -0.11     | 0.82701        |
| MAL14 - Quality of Movement | Days since stroke                   | 0.00      | 0.28766        |
| MAL14 - Quality of Movement | Age                                 | 0.01      | 0.66208        |
| MAL14 - Quality of Movement | Self-directed training: Yes=1/No=0  | -0.19     | 0.35725        |
| MAL14 - Quality of Movement | Therapy reduction: Yes=1/No=0       | 0.03      | 0.96487        |
| MAL14 - Quality of Movement | Random subject factor               |           | <b>0.00000</b> |
| MAL14 - Amount of Movement  | Study start                         | 0.41      | 0.08419        |
| MAL14 - Amount of Movement  | End of shutdown                     | 0.25      | 0.31699        |
| MAL14 - Amount of Movement  | Follow-up                           | 0.21      | 0.42117        |
| MAL14 - Amount of Movement  | NIHSS                               | -0.36     | <b>0.00003</b> |
| MAL14 - Amount of Movement  | Sex (male)                          | -0.11     | 0.83691        |
| MAL14 - Amount of Movement  | Days since stroke                   | 0.00      | 0.23875        |
| MAL14 - Amount of Movement  | Age                                 | 0.01      | 0.55681        |
| MAL14 - Amount of Movement  | Self-directed training: Yes=1/No=0  | 0.02      | 0.92699        |
| MAL14 - Amount of Movement  | Therapy reduction: Yes=1/No=0       | 0.00      | 0.99601        |
| MAL14 - Amount of Movement  | Random subject factor               |           | <b>0.00000</b> |

HADS: Hospital Anxiety and Depression Scale; IPAQ: International Physical Activity Questionnaire; MAL: Motor Activity Log; NIHSS: National Institutes of Health Stroke Scale. Bold font indicates p-values with a statistical significance of < 0.05.
