# Supplementary material for: CHANGES IN STROKE REHABILITATION DURING THE SARS-COV-2 SHUTDOWN IN SWITZERLAND
Source: PubMed Central journal article supplement — J Rehabil Med. 2022 Mar 1;54:1118. doi: 10.2340/jrm.v53.1118 (PMC8902586; doi:10.2340/jrm.v53.1118), 2022-03-01
Supplement: JRM-54-1118-s5.pdf [file JRM-54-1118-s5.pdf]

**Table SV** Number of subjects above the Hospital Anxiety and Depression Sub-Scale 8-point cut-off scores

| Assessment                            | Retrospective data<br><i>n</i> (%) | Visit 1<br>During shutdown |                 | Visit 2<br>Partially opening |                 | Visit 3<br>3-Month's follow-up |                 |
|---------------------------------------|------------------------------------|----------------------------|-----------------|------------------------------|-----------------|--------------------------------|-----------------|
|                                       |                                    | <i>n</i> (%)               | <i>p</i> -value | <i>n</i> (%)                 | <i>p</i> -value | <i>n</i> (%)                   | <i>p</i> -value |
| Hospital Anxiety and Depression Scale |                                    |                            |                 |                              |                 |                                |                 |
| Anxiety                               | 7 (19.44)                          | 4 (11.11)                  | <b>0.018</b>    | 4 (11.11)                    | 0.113           | 4 (11.11)                      | <b>0.048</b>    |
| Depression                            | 3 (8.33)                           | 6 (16.67)                  | <b>0.034</b>    | 7 (19.44)                    | <b>0.047</b>    | 5 (13.89)                      | <b>0.040</b>    |

Bold font indicates *p*-values with a statistical significance of < 0.05.
