# Supplementary material for: CHANGES IN STROKE REHABILITATION DURING THE SARS-COV-2 SHUTDOWN IN SWITZERLAND
Source: PubMed Central journal article supplement — J Rehabil Med. 2022 Mar 1;54:1118. doi: 10.2340/jrm.v53.1118 (PMC8902586; doi:10.2340/jrm.v53.1118), 2022-03-01
Supplement: JRM-54-1118-s6.pdf [file JRM-54-1118-s6.pdf]

**Table SVI.** Linear mixed effect models on motor function and activities.

| Model                    | Variable (fixed and random effects) | Estimate | p-value        |
|--------------------------|-------------------------------------|----------|----------------|
| FMMA – Upper Extremity   | End of shutdown                     | 2.00     | 0.15741        |
| FMMA – Upper Extremity   | Follow-up                           | 3.49     | <b>0.01854</b> |
| FMMA – Upper Extremity   | NIHSS                               | -4.64    | <b>0.00000</b> |
| FMMA – Upper Extremity   | Sex (male)                          | -0.60    | 0.87672        |
| FMMA – Upper Extremity   | Days since stroke                   | 0.01     | 0.69436        |
| FMMA – Upper Extremity   | Age                                 | 0.04     | 0.78899        |
| FMMA – Upper Extremity   | Self-directed training: Yes=1/No=0  | 0.06     | 0.97001        |
| FMMA – Upper Extremity   | Therapy reduction: Yes=1/No=0       | -2.61    | 0.61014        |
| FMMA – Upper Extremity   | Random subject factor               |          | <b>0.00000</b> |
| FMMA – Lower Extremity   | End of shutdown                     | 1.26     | 0.14979        |
| FMMA – Lower Extremity   | Follow-up                           | 2.69     | <b>0.00362</b> |
| FMMA – Lower Extremity   | NIHSS                               | -1.65    | <b>0.00000</b> |
| FMMA – Lower Extremity   | Sex (male)                          | -2.10    | 0.25299        |
| FMMA – Lower Extremity   | Days since stroke                   | 0.01     | 0.29092        |
| FMMA – Lower Extremity   | Age                                 | -0.06    | 0.42369        |
| FMMA – Lower Extremity   | Self-directed training: Yes=1/No=0  | -1.05    | 0.29251        |
| FMMA – Lower Extremity   | Therapy reduction: Yes=1/No=0       | -0.18    | 0.94046        |
| FMMA – Lower Extremity   | Random subject factor               |          | <b>0.00000</b> |
| Action Research Arm Test | End of shutdown                     | 3.36     | 0.05949        |
| Action Research Arm Test | Follow-up                           | 3.39     | 0.07021        |
| Action Research Arm Test | NIHSS                               | -4.84    | <b>0.00000</b> |
| Action Research Arm Test | Sex (male)                          | -2.02    | 0.68625        |
| Action Research Arm Test | Days since stroke                   | 0.01     | 0.52218        |
| Action Research Arm Test | Age                                 | -0.13    | 0.52726        |
| Action Research Arm Test | Self-directed training: Yes=1/No=0  | 1.71     | 0.41838        |
| Action Research Arm Test | Therapy reduction: Yes=1/No=0       | -5.68    | 0.38302        |
| Action Research Arm Test | Random subject factor               |          | <b>0.00000</b> |
| Ten-Meter Walk Test      | End of shutdown                     | -1.10    | 0.37050        |
| Ten-Meter Walk Test      | Follow-up                           | -3.54    | <b>0.00499</b> |
| Ten-Meter Walk Test      | NIHSS                               | 0.80     | <b>0.02335</b> |
| Ten-Meter Walk Test      | Sex (male)                          | 3.50     | <b>0.03103</b> |
| Ten-Meter Walk Test      | Days since stroke                   | 0.01     | 0.20365        |
| Ten-Meter Walk Test      | Age                                 | -0.04    | 0.52915        |
| Ten-Meter Walk Test      | Self-directed training: Yes=1/No=0  | 2.04     | 0.09234        |
| Ten-Meter Walk Test      | Therapy reduction; Yes=1/No=0       | -1.94    | 0.28867        |
| Ten-Meter Walk Test      | Random subject factor               |          | 0.15577        |

FMMA: Fugl-Meyer Motor Assessment; NIHSS: National Institutes of Health Stroke Scale. Bold font indicates p-values with a statistical significance of <0.05.
