# Supplementary material for: CHANGES IN STROKE REHABILITATION DURING THE SARS-COV-2 SHUTDOWN IN SWITZERLAND
Source: PubMed Central journal article supplement — J Rehabil Med. 2022 Mar 1;54:1118. doi: 10.2340/jrm.v53.1118 (PMC8902586; doi:10.2340/jrm.v53.1118), 2022-03-01
Supplement: JRM-54-1118-s7.pdf [file JRM-54-1118-s7.pdf]

**Table SVII.** Linear mixed effect models on additional outcomes

| Model                    | Variable (fixed and random effects) | Estimate | p-value        |
|--------------------------|-------------------------------------|----------|----------------|
| PROMIS29 Mood Subscales  | End of shutdown                     | 0.19     | 0.93659        |
| PROMIS29 Mood Subscales  | Follow-up                           | 1.94     | 0.42245        |
| PROMIS29 Mood Subscales  | NIHSS                               | 0.03     | 0.95720        |
| PROMIS29 Mood Subscales  | Sex (male)                          | 2.17     | 0.62009        |
| PROMIS29 Mood Subscales  | Days since stroke                   | -0.01    | 0.70391        |
| PROMIS29 Mood Subscales  | Age                                 | -0.09    | 0.62907        |
| PROMIS29 Mood Subscales  | Self-directed training: Yes=1/No=0  | -2.27    | 0.39390        |
| PROMIS29 Mood Subscales  | Therapy reduction: Yes=1/No=0       | 5.81     | 0.32079        |
| PROMIS29 Mood Subscales  | Random subject factor               |          | <b>0.00104</b> |
| Fatigue Severity Scale   | Study start                         | -1.37    | 0.73392        |
| Fatigue Severity Scale   | End of shutdown                     | 2.35     | 0.59564        |
| Fatigue Severity Scale   | Follow-up                           | 2.44     | 0.57842        |
| Fatigue Severity Scale   | NIHSS                               | -0.32    | 0.49438        |
| Fatigue Severity Scale   | Sex (male)                          | 2.26     | 0.53247        |
| Fatigue Severity Scale   | Days since stroke                   | 0.00     | 0.92328        |
| Fatigue Severity Scale   | Age                                 | 0.14     | 0.36946        |
| Fatigue Severity Scale   | Self-directed training: Yes=1/No=0  | -0.31    | 0.93379        |
| Fatigue Severity Scale   | Therapy reduction: Yes=1/No=0       | 3.64     | 0.44508        |
| Fatigue Severity Scale   | Random subject factor               |          | 0.76487        |
| Rivermead Mobility Index | Study start                         | 5.58     | <b>0.00000</b> |
| Rivermead Mobility Index | End of shutdown                     | 5.66     | <b>0.00000</b> |
| Rivermead Mobility Index | Follow-up                           | 6.12     | <b>0.00000</b> |
| Rivermead Mobility Index | NIHSS                               | -0.83    | <b>0.00001</b> |
| Rivermead Mobility Index | Sex (male)                          | -1.53    | 0.15578        |
| Rivermead Mobility Index | Days since stroke                   | 0.01     | 0.04810        |
| Rivermead Mobility Index | Age                                 | -0.04    | 0.37160        |
| Rivermead Mobility Index | Self-directed training: Yes=1/No=0  | -0.38    | 0.19472        |
| Rivermead Mobility Index | Therapy reduction: Yes=1/No=0       | 0.04     | 0.97871        |
| Rivermead Mobility Index | Random subject factor               |          | <b>0.00000</b> |
| ABC Scale                | End of shutdown                     | 5.43     | 0.14619        |
| ABC Scale                | Follow-up                           | 2.54     | 0.49119        |
| ABC Scale                | NIHSS                               | -5.14    | <b>0.00005</b> |
| ABC Scale                | Sex (male)                          | -16.73   | 0.04030        |
| ABC Scale                | Days since stroke                   | 0.03     | 0.32298        |
| ABC Scale                | Age                                 | -0.23    | 0.49198        |
| ABC Scale                | Self-directed training: Yes=1/No=0  | -1.46    | 0.71698        |
| ABC Scale                | Therapy reduction: Yes=1/No=0       | -1.66    | 0.87105        |
| ABC Scale                | Random subject factor               |          | <b>0.00000</b> |
| modified Rankin Scale    | Study start                         | -0.64    | <b>0.00056</b> |
| modified Rankin Scale    | End of shutdown                     | -0.64    | <b>0.00114</b> |
| modified Rankin Scale    | Follow-up                           | -0.66    | <b>0.00116</b> |
| modified Rankin Scale    | NIHSS                               | 0.19     | <b>0.00017</b> |
| modified Rankin Scale    | Sex (male)                          | 0.21     | 0.52591        |
| modified Rankin Scale    | Days since stroke                   | 0.00     | 0.78205        |
| modified Rankin Scale    | Age                                 | 0.02     | 0.28289        |
| modified Rankin Scale    | Self-directed training: Yes=1/No=0  | 0.27     | 0.15395        |
| modified Rankin Scale    | Therapy reduction: Yes=1/No=0       | -0.02    | 0.97087        |
| modified Rankin Scale    | Random subject factor               |          | <b>0.00000</b> |
| NIHSS                    | End of shutdown                     | -0.62    | 0.10950        |
| NIHSS                    | Follow-up                           | -1.19    | <b>0.00402</b> |
| NIHSS                    | NIHSS                               | 0.85     | <b>0.00000</b> |
| NIHSS                    | Sex (male)                          | 0.93     | <b>0.02941</b> |
| NIHSS                    | Days since stroke                   | 0.00     | 0.05077        |
| NIHSS                    | Age                                 | -0.01    | 0.41810        |
| NIHSS                    | Self-directed training: Yes=1/No=0  | 0.74     | 0.05836        |
| NIHSS                    | Therapy reduction: Yes=1/No=0       | -0.01    | 0.98646        |
| NIHSS                    | Random subject factor               |          | 0.48723        |

ABC Scale: Activities -specific Balance Confidence Scale; NIHSS: National Institutes of Health Stroke Scale. Bold font indicates p-values with a statistical significance of <0.05.
