# Supplementary figures and images for: CHANGES IN STROKE REHABILITATION DURING THE SARS-COV-2 SHUTDOWN IN SWITZERLAND
Source: PubMed Central journal article supplement — J Rehabil Med. 2022 Mar 1;54:1118. doi: 10.2340/jrm.v53.1118 (PMC8902586; doi:10.2340/jrm.v53.1118), 2022-03-01

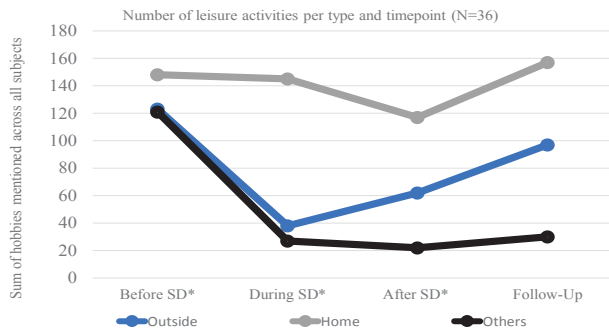

Fig. S1. Change in leisure activities over time. SD: Shutdown.

Supplement: JRM-54-1118-s1.pdf [file JRM-54-1118-s1.pdf]
